# Supplementary material
Source: PubMed Central journal article supplement (PMC7572686)

## Supplementary Appendix

Early brain biomarkers of post-traumatic seizures: Initial report of the multicenter Epilepsy  
Bioinformatics Study for Anti-epileptogenic Therapy (EpiBioS4Rx) prospective study

Evan S. Lutkenhoff<sup>ff</sup><sup>a,b</sup>, Vikesh Shrestha<sup>b</sup>, Jesus Ruiz Tejada<sup>b</sup>, Courtney Real<sup>b</sup>, David L. McArthur<sup>b</sup>,  
Dominique Duncan<sup>c</sup>, Marianna La Rocca<sup>c</sup>, Rachael Garner<sup>c</sup>, Arthur W. Toga<sup>c</sup>, Paul M. Vespa<sup>b,c</sup>,  
Martin M. Monti<sup>a,b,e,\*</sup> for the EpiBioS4Rx Study Group

<sup>a</sup>*Department of Psychology, University of California Los Angeles, Los Angeles, CA, USA*

<sup>b</sup>*Brain Injury Research Center (BIRC), Department of Neurosurgery, David Geffen School of Medicine at  
UCLA, Los Angeles, CA, USA*

<sup>c</sup>*Laboratory of Neuro Imaging, USC Stevens Neuroimaging and Informatics Institute, Keck School of  
Medicine of USC, University of Southern California, Los Angeles, CA, USA*

<sup>d</sup>*Department of Neurology, David Geffen School of Medicine at UCLA, Los Angeles, CA, USA*

<sup>e</sup>*Department of Psychiatry and Biobehavioral Sciences, University of California Los Angeles, CA, USA*

\*To whom correspondence should be addressed: Martin M Monti, UCLA Department of Psychology, Los  
Angeles CA, 90095, USA; +1(310) 825-8546; [monti@psych.ucla.edu](mailto:monti@psych.ucla.edu)

## Table of Contents

|                         |   |
|-------------------------|---|
| <b>Table S1.</b> .....  | 2 |
| <b>Table S2.</b> .....  | 3 |
| <b>Figure S1.</b> ..... | 5 |
| <b>Figure S2.</b> ..... | 6 |

**Table S1.** Comparison of the predictive ability of the three models. Model 1 includes demographic data only (including the days post injury at which the MR session was held). Model 2 includes demographic and clinical (i.e., GCS total) data. Model 3 includes demographic, clinical, and MR component data. (Abbreviation: TP, true positives; FP, false positives; TN, true negatives; FN, false negatives; AUC, area under the curve; Acc, accuracy; Sens, sensitivity; Spec, specificity; Prec, precision.)

| Model            | TP | FP | TN | FN | AUC  | Acc  | Sens | Spec | Prec |
|------------------|----|----|----|----|------|------|------|------|------|
| M1: Demo         | 4  | 2  | 31 | 20 | 0.59 | 0.61 | 0.09 | 0.89 | 0.33 |
| M2: Demo+Clin    | 6  | 4  | 31 | 16 | 0.64 | 0.65 | 0.64 | 0.89 | 0.60 |
| M3: Demo+Clin+MR | 16 | 4  | 31 | 3  | 0.89 | 0.87 | 0.73 | 0.89 | 0.80 |

**Table S2.** Binary logistic regression coefficients. (Abbreviations: b, regression coefficient; SE, standard error (robust); OR, odds ratio; LB, confidence interval lower bound; UB, confidence interval upper bound.)

|                              | b     | SE    | OR       | z     | p    | 95% CI |       |
|------------------------------|-------|-------|----------|-------|------|--------|-------|
|                              |       |       |          |       |      | LB     | UB    |
| (Intercept)                  | 19.56 | 11.69 | 3.128e+8 | 1.67  | 0.09 | -3.36  | 42.48 |
| Age                          | 0.05  | 0.04  | 1.06     | 1.43  | 0.15 | -0.02  | 0.13  |
| Day of MR                    | -0.09 | 0.08  | 0.92     | -1.16 | 0.25 | -0.24  | 0.06  |
| Admission GCS <sub>Tot</sub> | -0.28 | 0.12  | 0.76     | -2.35 | 0.02 | -0.51  | -0.05 |
| Sex (Female)                 | 1.14  | 1.42  | 3.13     | 0.80  | 0.42 | -1.65  | 3.93  |
| Whole brain                  | 0.00  | 0.00  | 1.00     | -1.60 | 0.11 | 0.00   | 0.00  |
| PC Ctx Parietal (LH)         | 1.04  | 0.74  | 2.84     | 1.41  | 0.16 | -0.40  | 2.49  |
| PC Ctx Occip (Bil)           | -0.17 | 0.37  | 0.84     | -0.46 | 0.64 | -0.91  | 0.56  |
| PC Ctx OrbitFrontal (RH)     | 0.46  | 0.50  | 1.58     | 0.92  | 0.36 | -0.52  | 1.43  |
| PC Ctx Central (RH)          | 0.86  | 0.75  | 2.37     | 1.14  | 0.25 | -0.62  | 2.34  |
| PC SbCtx All (Bil)           | 0.22  | 0.43  | 1.25     | 0.52  | 0.61 | -0.62  | 1.07  |
| PC Ctx IFG (Bil)             | 0.08  | 0.84  | 1.08     | 0.10  | 0.93 | -1.56  | 1.72  |
| PC SubCtx Hipp (Bil)         | -1.12 | 0.67  | 0.33     | -1.68 | 0.09 | -2.42  | 0.19  |
| PC Ctx Temporal (RH)         | -0.01 | 0.35  | 0.99     | -0.02 | 0.99 | -0.70  | 0.68  |
| PC Ctx Fronto-Temporal (LH)  | 1.57  | 0.83  | 4.78     | 1.88  | 0.06 | -0.07  | 3.20  |
| PC SbCtx Putamen (Bil)       | -0.61 | 0.44  | 0.54     | -1.38 | 0.17 | -1.47  | 0.25  |
| PC Ctx Cingul (RH)           | -0.43 | 0.55  | 0.65     | -0.78 | 0.44 | -1.50  | 0.65  |
| PC Ctx Tmp Pole (LH)         | -1.09 | 0.50  | 0.34     | -2.17 | 0.03 | -2.07  | -0.11 |
| PC SbCtx Amygdala (Bil)      | 0.11  | 0.51  | 1.11     | 0.21  | 0.83 | -0.89  | 1.10  |
| PC Ctx FrPole (LH)           | -1.48 | 0.60  | 0.23     | -2.47 | 0.01 | -2.65  | -0.31 |
| PC SbCtx BrainStem           | 0.53  | 0.34  | 1.69     | 1.53  | 0.13 | -0.15  | 1.20  |
| PC Ctx Insula (LH)           | -0.89 | 0.78  | 0.41     | -1.15 | 0.25 | -2.42  | 0.63  |

|                          |                        |      |      |       |      |       |      |   |
|--------------------------|------------------------|------|------|-------|------|-------|------|---|
| <i>Lutkenhoff et al.</i> | Supplementary Appendix |      |      |       |      |       |      | 4 |
| PC Ctx TempPole (RH)     | -0.12                  | 0.39 | 0.89 | -0.30 | 0.77 | -0.88 | 0.64 |   |
| PC Diff                  | -0.17                  | 0.47 | 0.84 | -0.37 | 0.71 | -1.10 | 0.75 |   |

---

Note. Seizure\_group\_bin level 'Yes' coded as class 1.

**Figure S1.** CONSORT flowchart.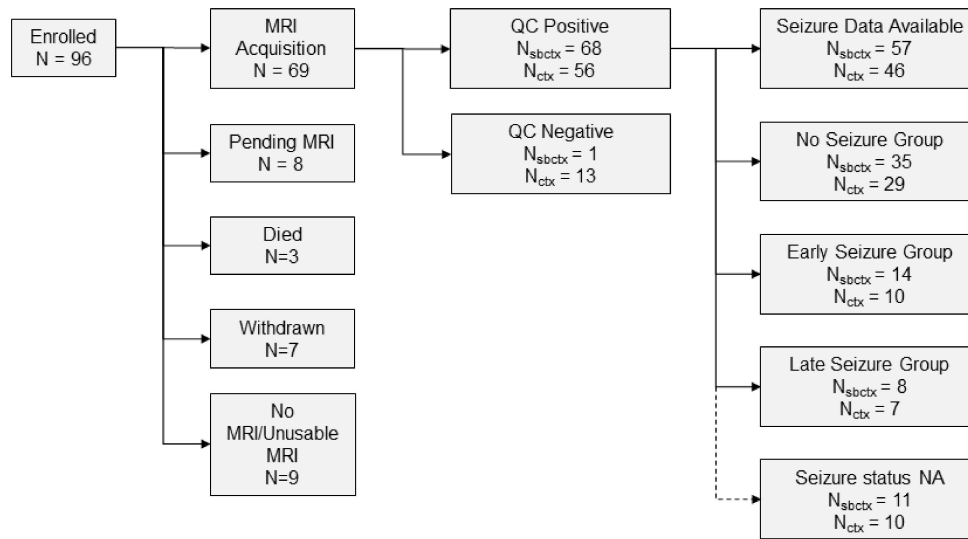

**Figure S2.** Depiction of component loadings for each brain ROI. Hot colors indicate positive loadings, cold color indicate negative loading. PC11 and PC12 are the components significantly related to seizure onset in the binary logistic regression described in the main text. (Abbrev: PC, principal component).

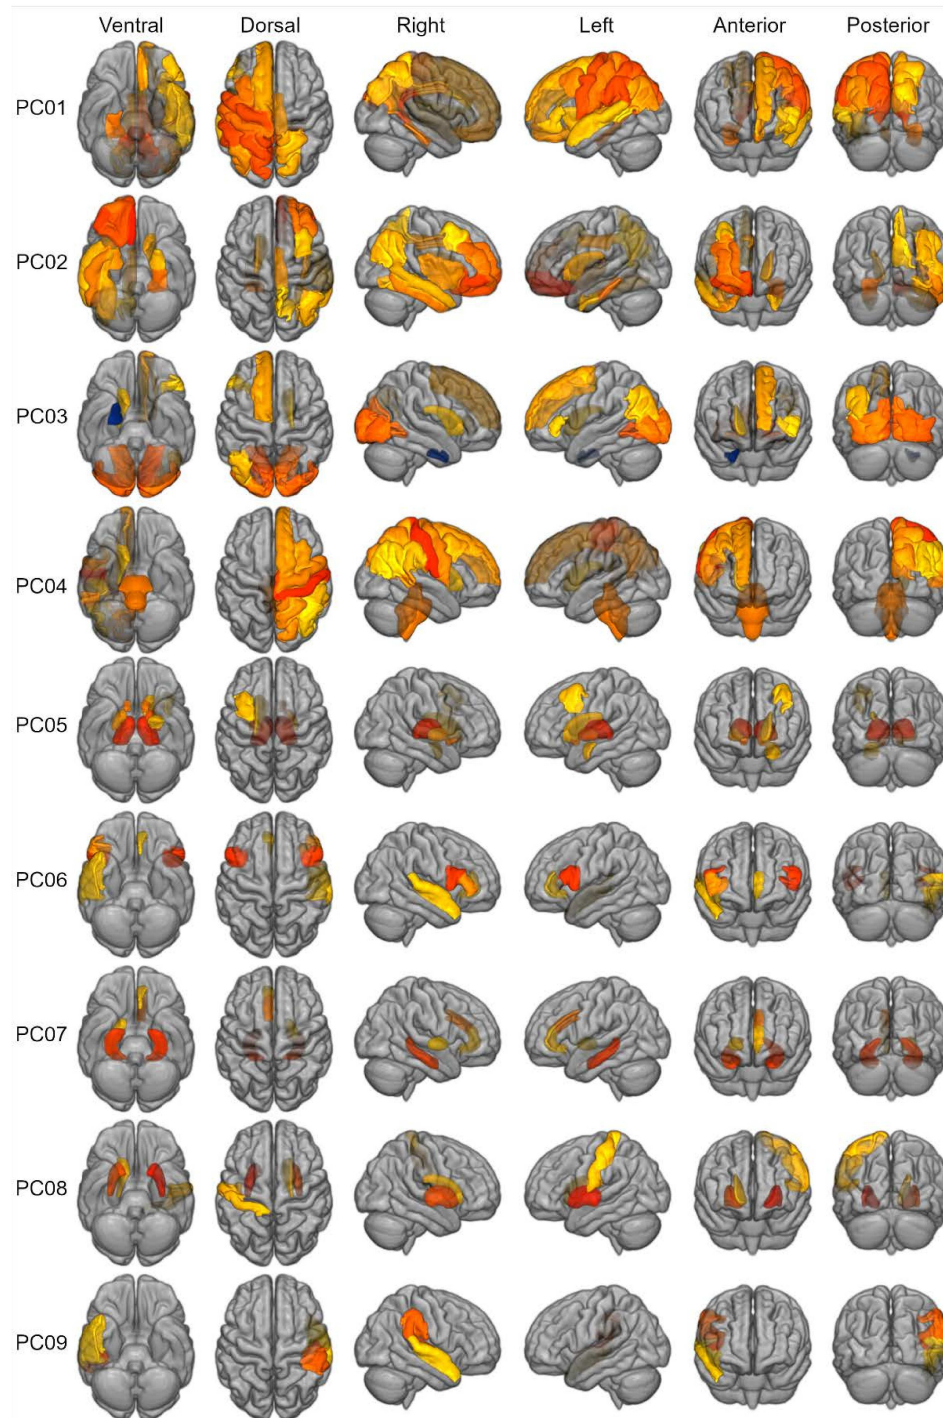

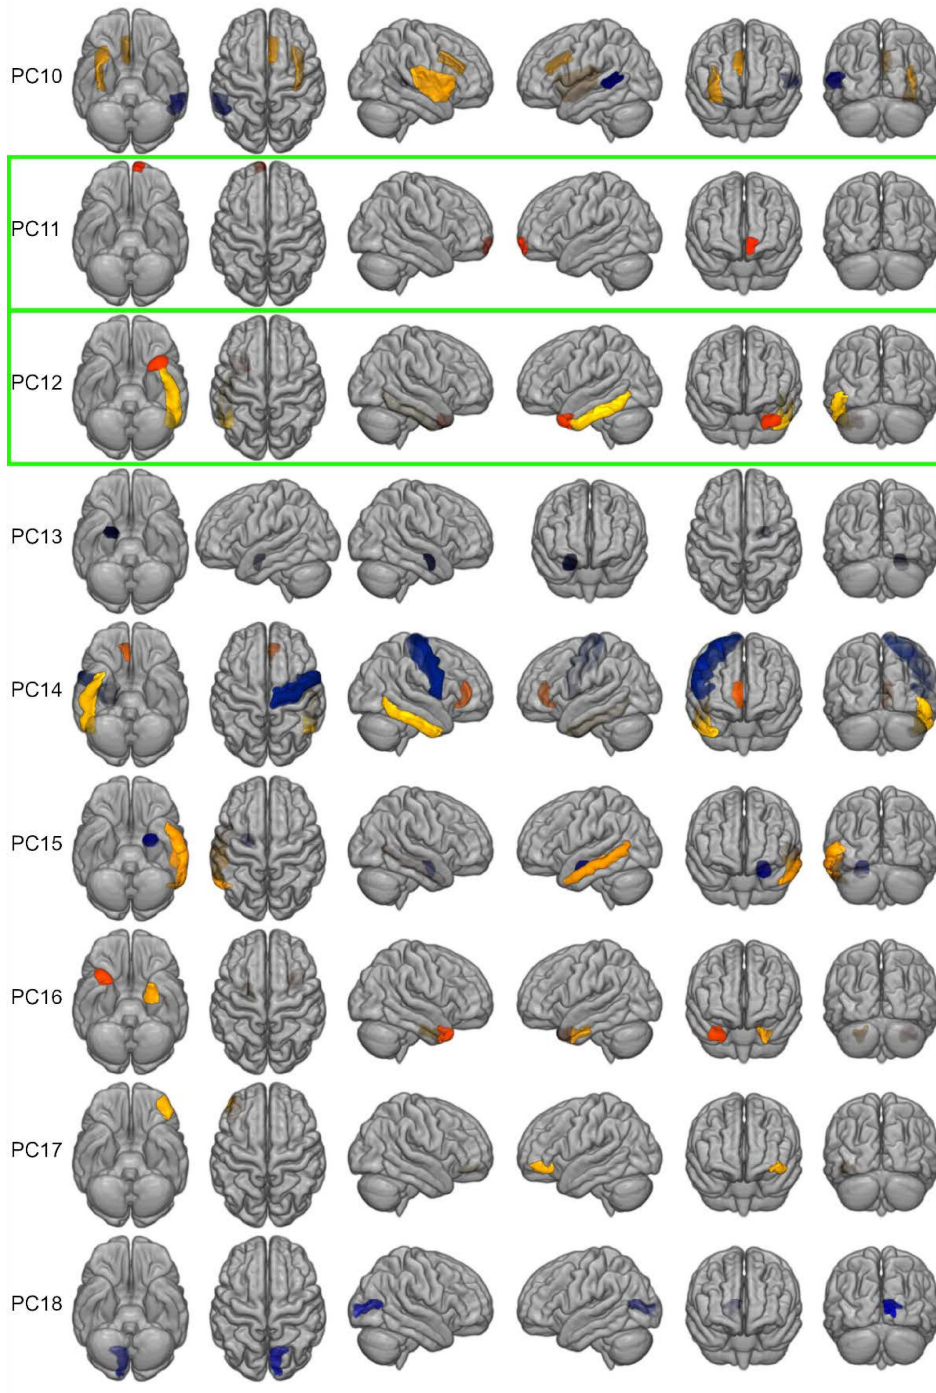

Supplement: NIHMS1631539-supplement-Supplementary_Material.pdf [file NIHMS1631539-supplement-Supplementary_Material.pdf]
